# Supplementary material for: Anaerobic Fluidized-Bed Membrane Bioreactor for Treatment of Liquid Fraction of Sludge Digestate: Performance and Agricultural Reuse Analysis
Source: MDPI journal article supplement (doi:10.3390/su15097698), 2023-05-08
Supplement: s1 [file s1]

**Supplementary material for**

**Anaerobic Fluidized-bed Membrane Bioreactor for**

**Treatment of Liquid Fraction of Sludge Digestate:**

**Performance and Agricultural Reuse Analysis**

**Lu Liu<sup>1</sup>, Jun Zhang<sup>1,\*</sup>, Yifan Chen<sup>1</sup>, Ze Guo<sup>1</sup>, Ganzhan Xu<sup>1</sup>, Linlin Yin<sup>1</sup>, Wei Han<sup>2</sup>, Yu Tian<sup>1</sup>  
and Stevo Lavrnić<sup>3</sup>**

<sup>1</sup> National Engineering Research Center for Safe Sludge Disposal and Resource Recovery, National and Local Joint Engineering Research Center of Biomass Energy Development and Utilization, School of Environment , Harbin Institute of Technology, Harbin, 150090, China;

<sup>2</sup> Binhai Branch of Weifang Ecological and Environmental Bureau, Binhai Economic and Technological Development Zone Future Building, Weifang, 261108, China;

<sup>3</sup> Department of Agricultural and Food Sciences, Alma Mater Studiorum-University of Bologna, Viale Giuseppe Fanin 40-50, 40127 Bologna, Italy.

\*Corresponding author. Tel: +(86) 451 8628 3077, Fax: +(86) 451 8628 3077, E-mail: hitsunyboy@126.com

## **1. Recovery of nitrogen in nutrient recovery units**

### *1.1 Effect of pH and time on the recovery of nitrogen by purging*

As shown in Fig. 1a, the removal of  $\text{NH}_4^+\text{-N}$  increases as the blowdown time increases and the blowdown pH increases. This is due to the fact that the blow-off is mainly related to the dissociation of  $\text{NH}_4^+\text{-N}$ . The longer the blow-off time, the more  $\text{NH}_3$  is naturally taken out of the solution and the higher the removal rate of  $\text{NH}_4^+\text{-N}$  from the solution. pH is higher, the easier it is for  $\text{NH}_4^+\text{-N}$  in the solution to proceed in the direction of generating free  $\text{NH}_3$ , and the easier it is for the  $\text{NH}_3$  to be taken out of the gas.

### *1.2 Effect of temperature on the recovery of nitrogen by purging*

The relationship between the purge temperature and the removal of  $\text{NH}_4^+\text{-N}$  at a purge time of 2 hours and a pH of 11 is shown in Fig. 1b. As the blowdown temperature increased, the removal rate of  $\text{NH}_3$  increased. This is because the increase in temperature intensifies the Brownian motion, making it easier for  $\text{NH}_3$  in the aqueous solution to escape. In addition, the higher the temperature, the higher the degree of dissociation of water, the more favorable the dissociation of  $\text{NH}_4^+\text{-N}$ , and the higher the rate of dissociation, resulting in higher  $\text{NH}_4^+\text{-N}$  removal.

## **2. Recovery of phosphorus in nutrient recovery units**

### *2.1 Effect of pH on phosphorus recovery by precipitation*

The effect of different pH values on the removal of  $\text{PO}_4^{3-}\text{-P}$  is shown in Fig. 2a. The formation of  $\text{MgNH}_4\text{PO}_4$  is most favored at a pH of 9. When the pH is too high or too low, the removal of phosphate ions is not favored. This is due to the fact that when the  $\text{pH} < 9$ , the  $\text{NH}_4^+\text{-N}$  solution in solution produces  $\text{NH}_3$  that binds to water, which is detrimental to the formation of  $\text{MgNH}_4\text{PO}_4$ . When the  $\text{pH} > 9$ ,  $\text{OH}^-$  in the solution competes with the  $\text{PO}_4^{3-}\text{-P}$  and  $\text{NH}_4^+\text{-N}$  to produce  $\text{Mg}(\text{OH})_2$ , resulting in a decrease in  $\text{Mg}^{2+}$  content of the solution, which is not conducive to the formation of  $\text{MgNH}_4\text{PO}_4$ . Therefore, the pH of the solution is too high or too low for the formation of  $\text{MgNH}_4\text{PO}_4$ .

## *2.2 Effect of P/N ratio on phosphorus recovery by precipitation*

The removal rates of phosphate for different P/N ratios are shown in Fig. 2b. The removal rate of  $\text{PO}_4^{3-}\text{-P}$  increased as the  $\text{NH}_4^+\text{-N}$  dosage was increased. When the P:N ratio exceeds 1:1.2, the increase in  $\text{PO}_4^{3-}\text{-P}$  removal decreases. Although there is still a large amount of  $\text{NH}_4^+\text{-N}$  in the solution, it is difficult to form  $\text{MgNH}_4\text{PO}_4$  at this point due to the limitations of  $\text{PO}_4^{3-}\text{-P}$  and  $\text{Mg}^{2+}$  content. Therefore, increasing the amount of  $\text{NH}_4^+\text{-N}$  added is beneficial to improve the removal rate of  $\text{PO}_4^{3-}\text{-P}$ , but beyond a certain percentage, there is no substantial increase in the generation of  $\text{MgNH}_4\text{PO}_4$ .

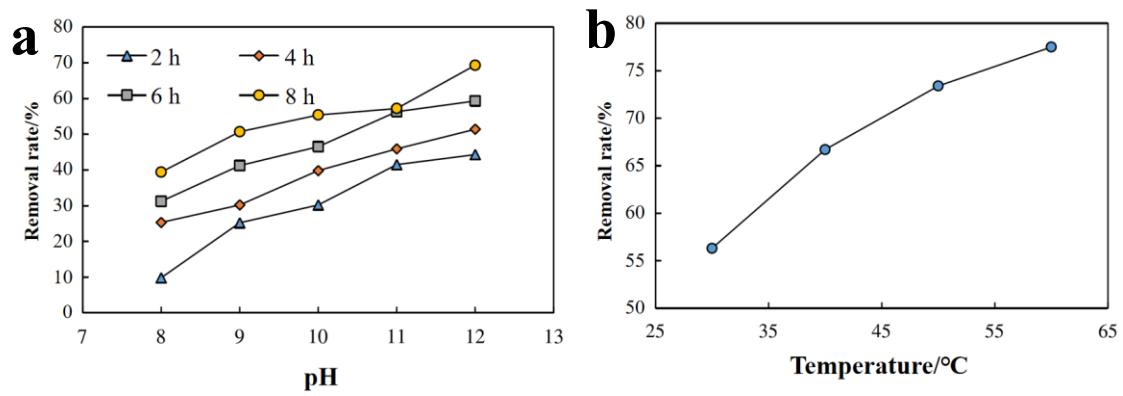

**Fig. S1** Effect of different blow-off conditions on  $\text{NH}_4^+\text{-N}$  removal.

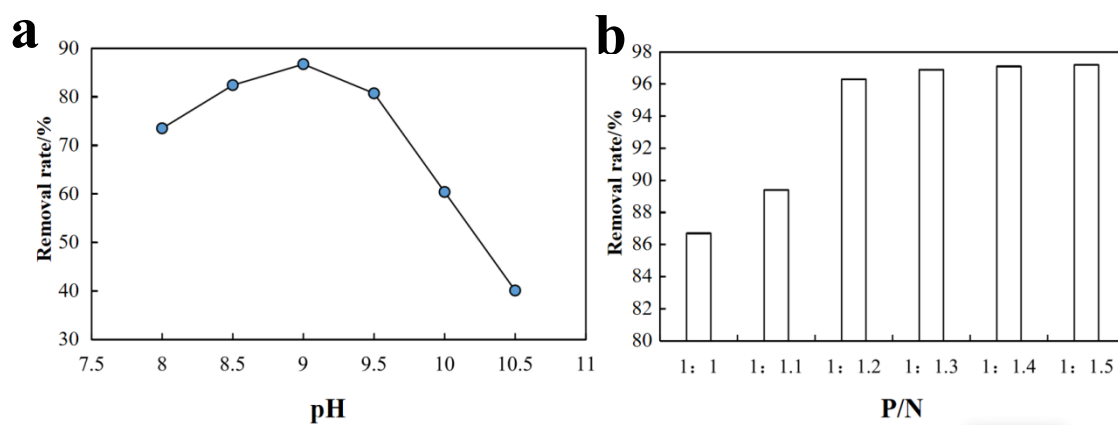

**Fig. S2** Effect of different blow-off conditions on  $\text{PO}_4^{3-}\text{-P}$  removal (**a**:  $\text{Mg:N:P} = 1:1:1$ ; **b**:  $\text{Mg:P} = 1:1$ ).
